# Supplementary material for: Contribution of Specific Residues of the β-Solenoid Fold to HET-s Prion Function, Amyloid Structure and Stability
Source: PubMed Central journal article supplement (PMC4055769; doi:10.1371/journal.ppat.1004158), 2014-06-12

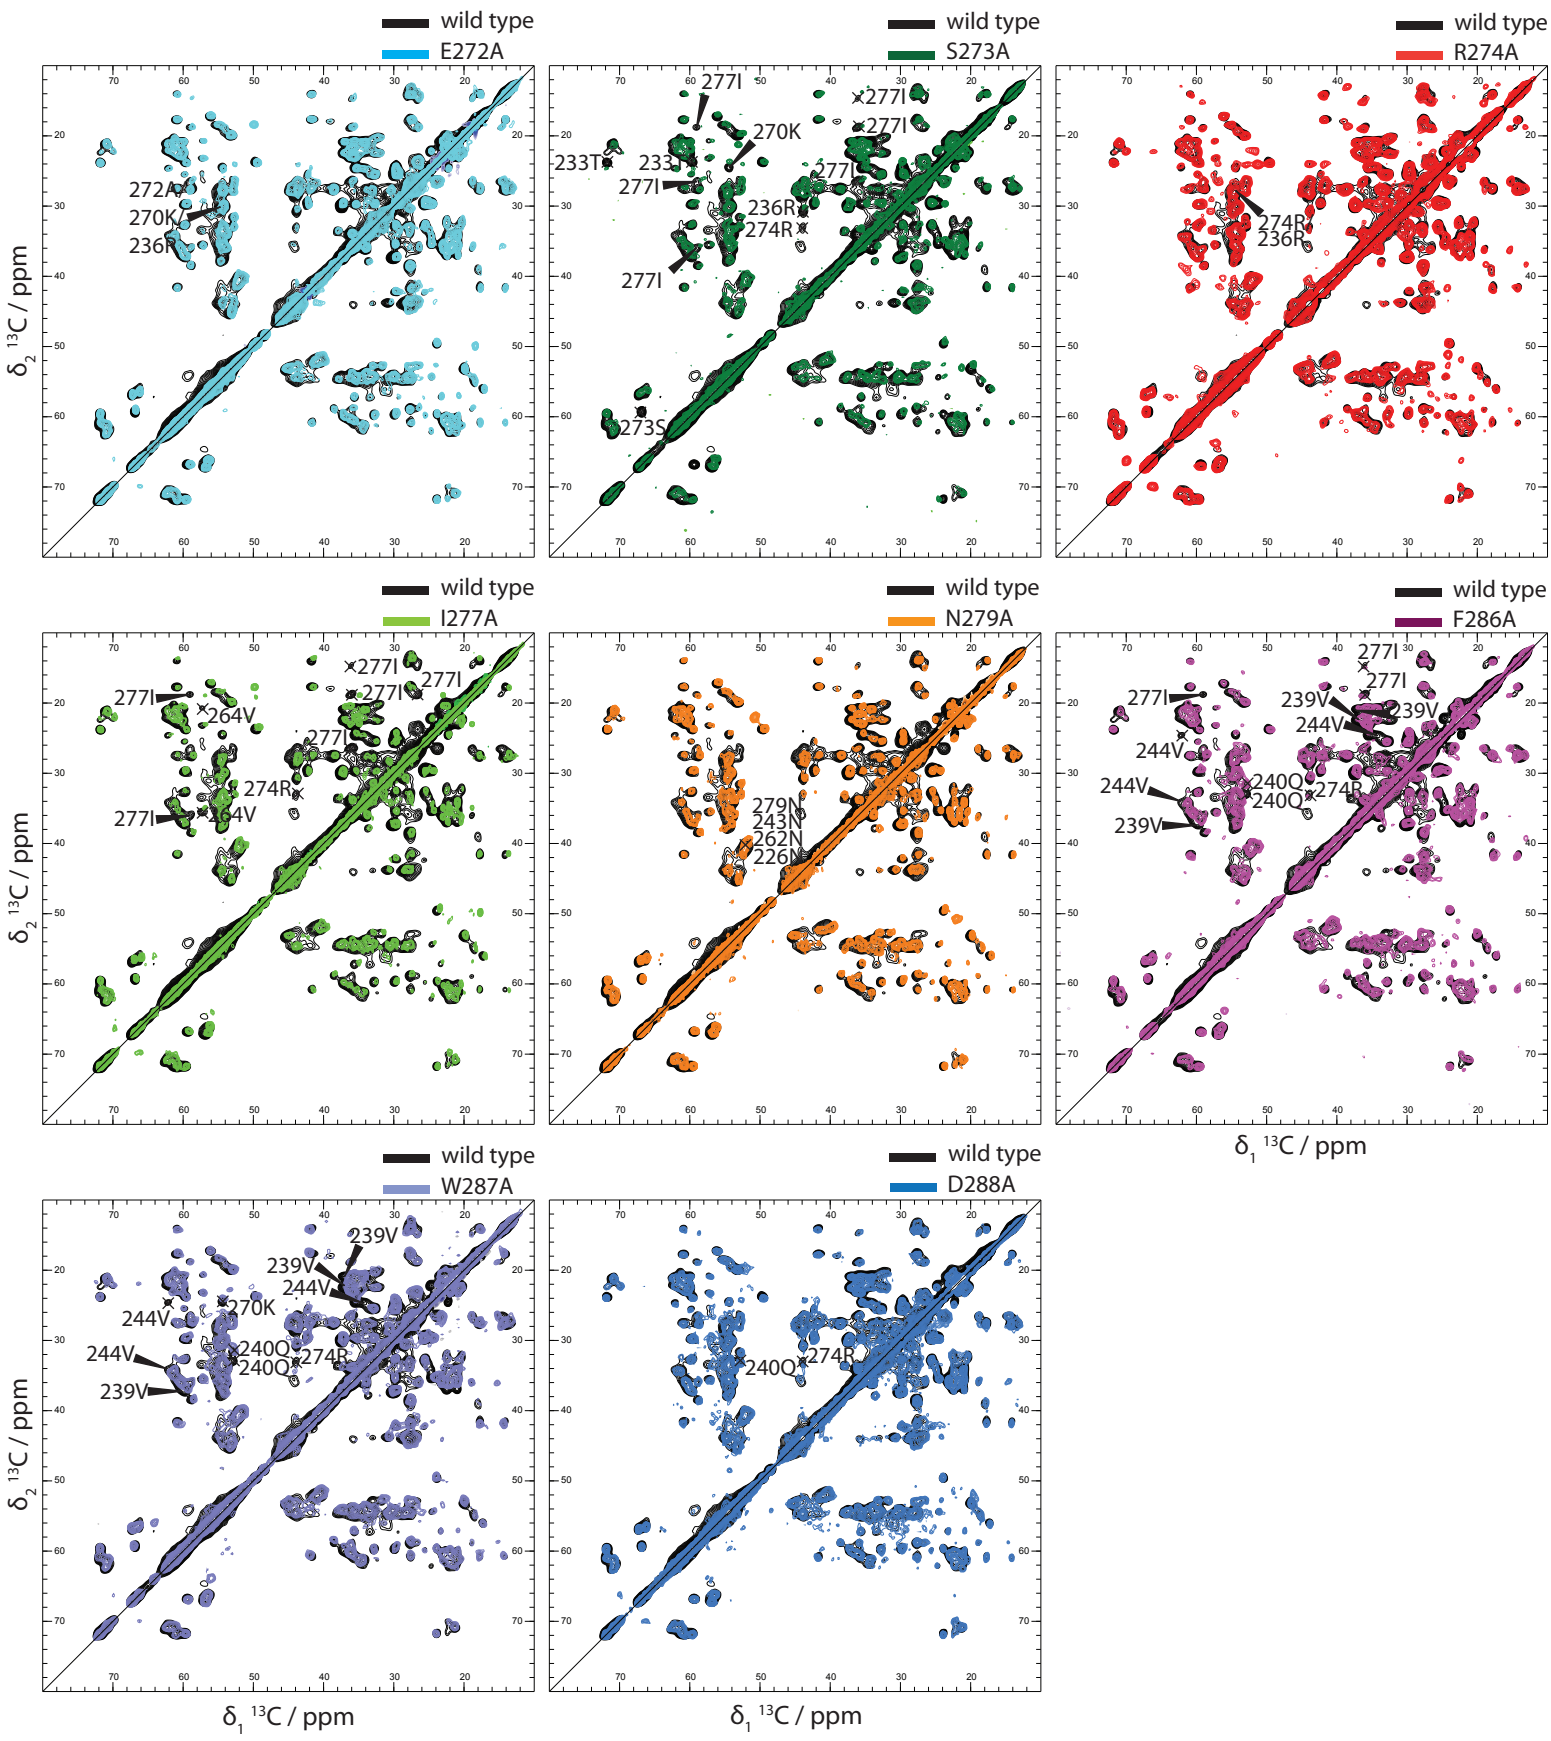

Supplement: ppat.1004158.s004.pdf [file ppat.1004158.s004.pdf]
